# Supplementary material for: Targeted knock-in of human immune-regulatory genes into the porcine GGTA1 exon 4 reveals divergent expression on red blood cell membranes
Source: Research Square preprint supplement (doi:10.21203/rs.3.rs-6906665/v1), 2025-07-16
Supplement: Supplementary file 1 [file 985f476bd2f340485aca017c.pdf]

**Table S1**

Production of hCD46.hTBM #2 transgenic pigs via somatic cell nuclear transfer (SCNT)

| Donor cells   | No. of recipients | Average no. of<br>SCNT embryos<br>transferred | Pregnancy (%) | Delivery (%) | Offspring<br>(Mean $\pm$ SEM) |
|---------------|-------------------|-----------------------------------------------|---------------|--------------|-------------------------------|
| hCD46.hTBM #2 | 3                 | 313.7 $\pm$ 10.2                              | 2 (66.7)      | 1 (33.3)     | 1                             |

1

**Table S2**

Oligonucleotide primers used for polymerase chain reaction

| CGTCCAGGTACTCGAA<br>CACTTCC Primer name | Primer sequence (5'-3')  | Capable of application for genotyping |
|-----------------------------------------|--------------------------|---------------------------------------|
| F1 primer                               | GACTTGGCTAATTTGCCAGT     | hCD46.hTBM KI, hCD59.hCD47 KI         |
| F2 primer                               | TGTTGGGAATCAGTCCTCTACTAG | hCD46.hTBM KI, hCD59.hCD47 KI         |
| R1 primer                               | GGTGTCAGTGAATCCTACTT     | hCD46.hTBM KI, hCD59.hCD47 KI         |
| R2 primer                               | CGTCCAGGTACTCGAACACTTCC  | hCD46.hTBM KI                         |
| R3 primer                               | TGGAATCTCCAAGGCGTCGTAGT  | hCD46.hTBM KI, hCD59.hCD47 KI         |

KI: Knock-in

**Table S3**

Oligonucleotide primers used for real-time polymer chain reaction

| Primer       | Primer sequence (5'-3') |                        | Product size |
|--------------|-------------------------|------------------------|--------------|
|              | Forward                 | Reverse                |              |
| <i>hCD46</i> | GCAAGCAGATCAGCGGCTTC    | TGGTGGACACCTTCAGGCACTT | 159 bp       |
| <i>hTBM</i>  | CCAGACTGGACCTGAATGGCG   | GGGTGCCGTAGGTGATAGACAC | 219 bp       |

3

4

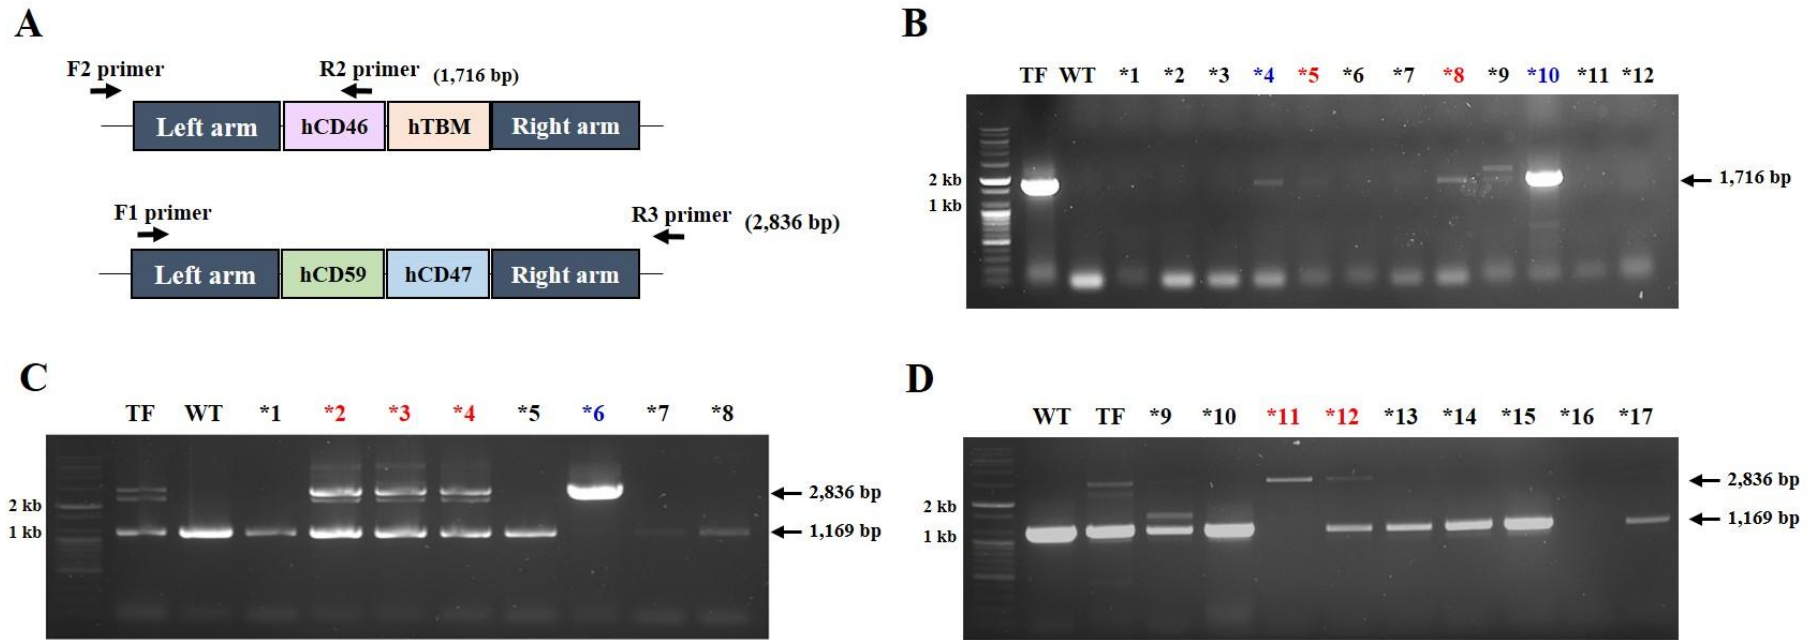

**Fig S1.** Gene analysis for the selection of knock-in cell lines. **(A)** Schematic diagram of the hCD46.hTBM KI and hCD59.hCD47 KI vectors, including the positions of PCR primers. When hCD46 and hTBM are successfully inserted, a 1,716-bp band is detected for the knock-in allele, whereas no band is observed for the wild-type allele. Similarly, when hCD59 and hCD47 are inserted, the knock-in allele yields a 2,836-bp band, whereas the wild-type allele produces a 1,169 bp band. **(B)** Gene analysis for the selection of cell lines in which the hCD46.hTBM KI vector was correctly inserted. Among the four candidates (\*4, \*5, \*8, and \*10), line \*10 was designated as hCD46.hTBM KI #1, and line \*4 as hCD46.hTBM KI #2 donor cells. **(C–D)** Gene analysis for the selection of cell lines in which the hCD59.hCD47 KI vector was correctly inserted. Among the six candidates (\*2, \*3, \*4, \*6, \*11, and \*12), line \*6 was selected as the hCD59.hCD47 KI donor cell line. Red and blue numbers

13 indicate cell lines in which knock-in was confirmed; among them blue numbers represent the cell lines used as donor cells for somatic cell  
14 nuclear transfer. The original agarose gel images are presented in Figure S3. bp: base pair; TF: Transfectant.

15

**A**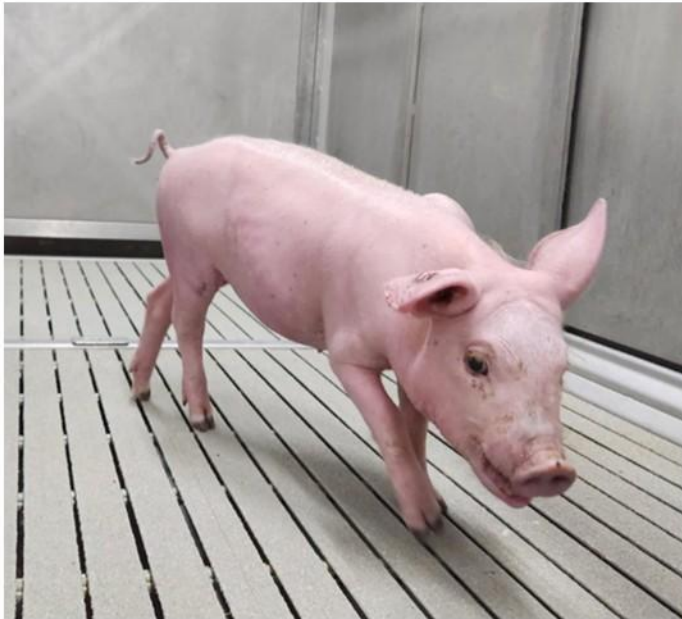**B**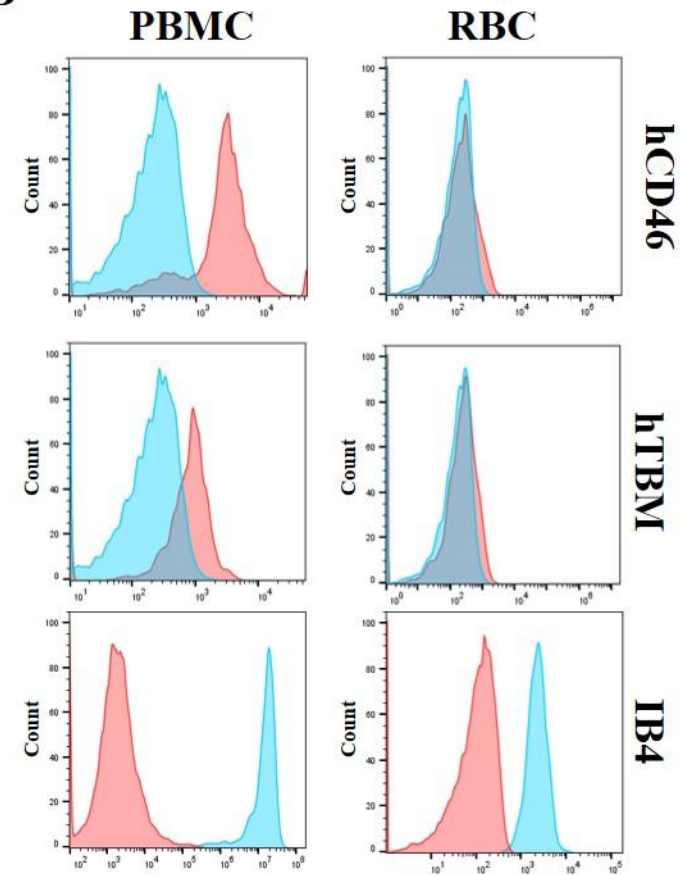

**Fig. S2.** Cloned transgenic pigs derived from a different colony than the one used to produce the hCD46.hTBM #2 pigs with *hCD46* and *hTBM* insertion. **(A)** Transgenic cloned pig. **(B)** hCD46 and hTBM expression analysis in peripheral blood mononuclear cells (PBMC) and

20 red blood cells (RBC) from transgenic pigs.  $\alpha$ -gal expression was not detected in either group. Red: Cloned transgenic pig. Blue: Wild type

21 pig.

22

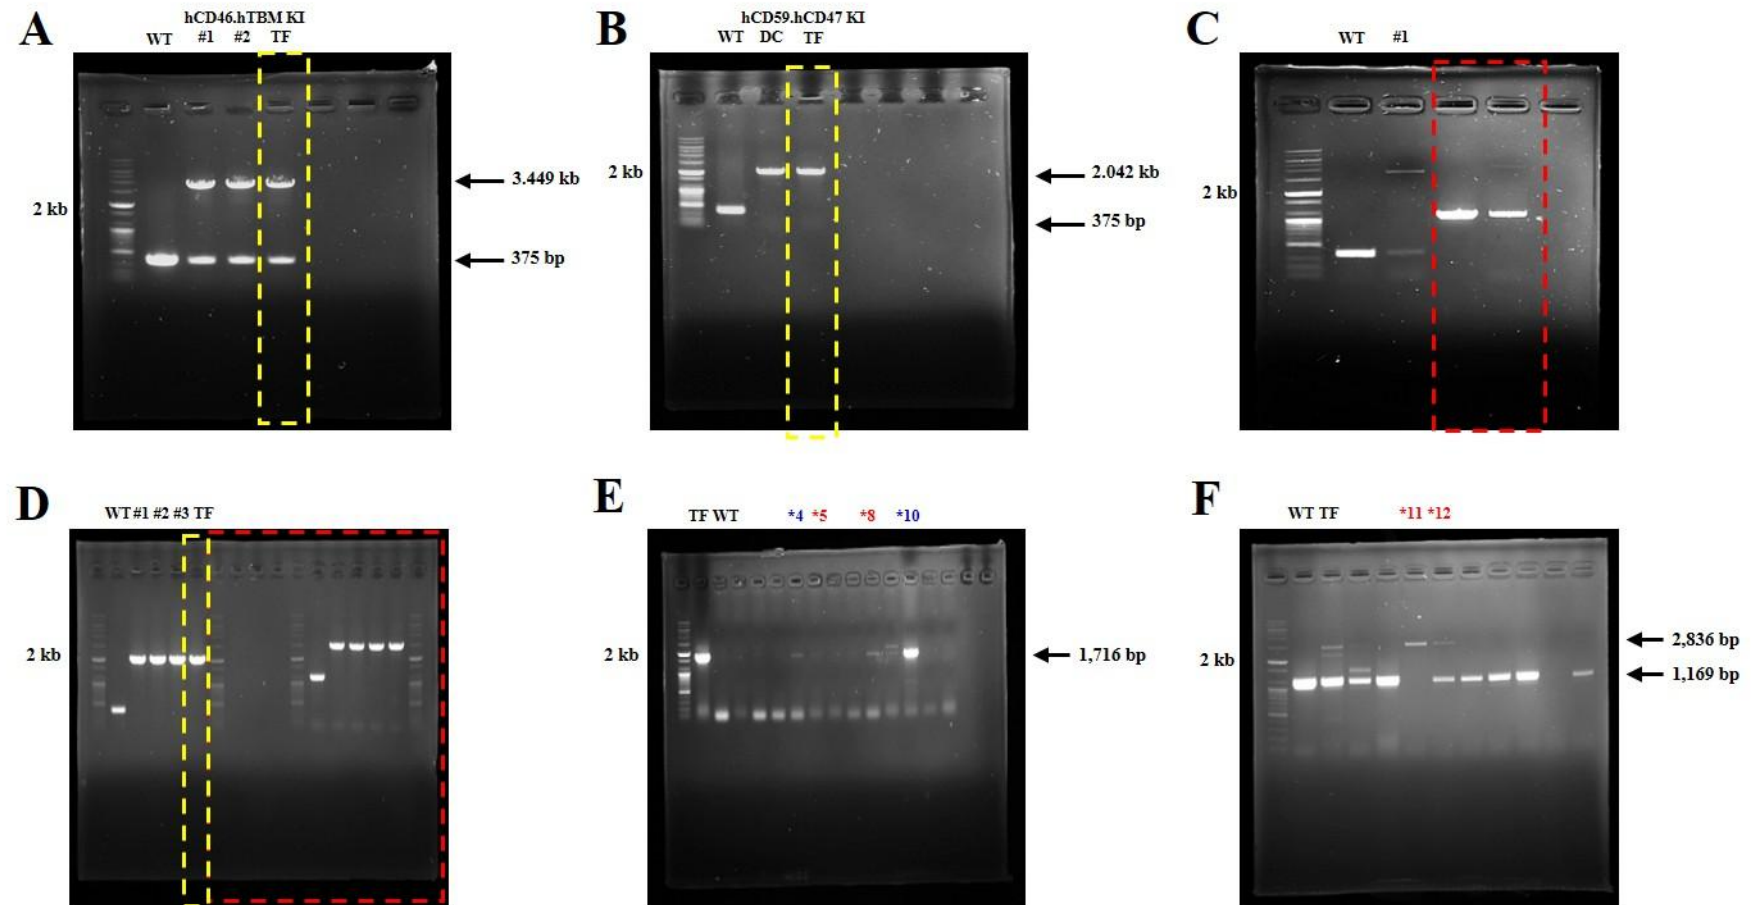

**Fig. S3.** The original agarose gel images used in this study. (A) Original image corresponding to Figure 1B. (B) Original image corresponding to Figure 1D. (C) Original image corresponding to Figure 2B. (D) Original image corresponding to Figure 2D. (E) Original image corresponding to Figure S1B. (F) Original image corresponding to Figure S1D. Unfortunately, the original image for Figure S1C is



27 unavailable due to unintentional data loss. However, the experiment shown in Figure S1C was conducted for the same purpose as Figure  
28 S1D, namely the screening of donor cell candidates, and involved loading samples onto a 12-comb agarose gel, as in Figure S1D. DC:  
29 Donor cell; TF: Transfectant; kb: kilobase; bp: base pair. Red dashed box: Not related band to the present study. Yellow dashed box:  
30 Transfectant band excluded from the main figure.

31
